# Supplementary material
Source: HighWire-hosted journal article supplement (https://erj.ersjournals.com/content/55/4/2000184)
Supplement: inline-supplementary-material-1 [file inline-supplementary-material-1.pdf]

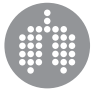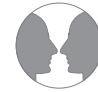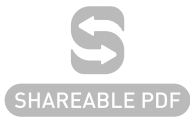

# The global significance of PRISm: how data from low- and middle-income countries link physiology to inflammation

Peter Jackson <sup>1,2</sup> and Trishul Siddharthan <sup>1,2</sup>

**Affiliations:** <sup>1</sup>Division of Pulmonary and Critical Care, School of Medicine, Johns Hopkins University, Baltimore, MD, USA. <sup>2</sup>Center for Global Non-Communicable Disease Research and Training, Johns Hopkins University, Baltimore, MD, USA.

**Correspondence:** Peter Jackson, Johns Hopkins University School of Medicine, Pulmonary Critical Care, 1830 E. Monument, 5th Floor, Baltimore, MD 21205-2105, USA. E-mail: pjacks35@jh.edu

 @ERSpublications  
**Does the high rate and unique risk factors of preserved ratio impaired spirometry in low- and middle-income countries have something to teach us about the physiology of this highly prevalent pattern?**  
<http://bit.ly/2SsQjeG>

**Cite this article as:** Jackson P, Siddharthan T. The global significance of PRISm: how data from low- and middle-income countries link physiology to inflammation. *Eur Respir J* 2020; 55: 2000184 [<https://doi.org/10.1183/13993003.00184-2020>].

This single-page version can be shared freely online.

## To the Editor:

We read with great interest the article by WIJNANT *et al.* [1] in a recent issue of *European Respiratory Journal* investigating the longitudinal outcomes of patients with preserved ratio impaired spirometry (PRISm) in the Rotterdam cohort. PRISm is a subject of increased investigation as it is associated with respiratory symptoms, cardiovascular disease, metabolic syndrome and, quite clearly in the recent study, increased mortality [1–3]. While there have been numerous studies examining outcomes related to PRISm in high-income countries (HICs), few studies have assessed the clinical significance of this spirometric finding in low- and middle-income countries (LMICs).
